# Supplementary material for: Pyramidal inversion in the solid state
Source: Royal Society of Chemistry journal article supplement (doi:10.1039/d4qi01021c), 2024-01-01
Supplement: d4qi01021c1.pdf [file d4qi01021c1.pdf]

# Supporting Information for: Pyramidal Inversion in the Solid State

Robin Turnbull,<sup>\*a</sup> Javier Gonzalez Platas,<sup>b</sup> Alfonso Muñoz,<sup>c</sup> Josu Sánchez-Martín,<sup>a</sup> M Jasmin,<sup>d</sup> Gaston Garbarino,<sup>c</sup> Daniel Errandonea,<sup>a</sup> and Akun Liang<sup>\*a</sup>

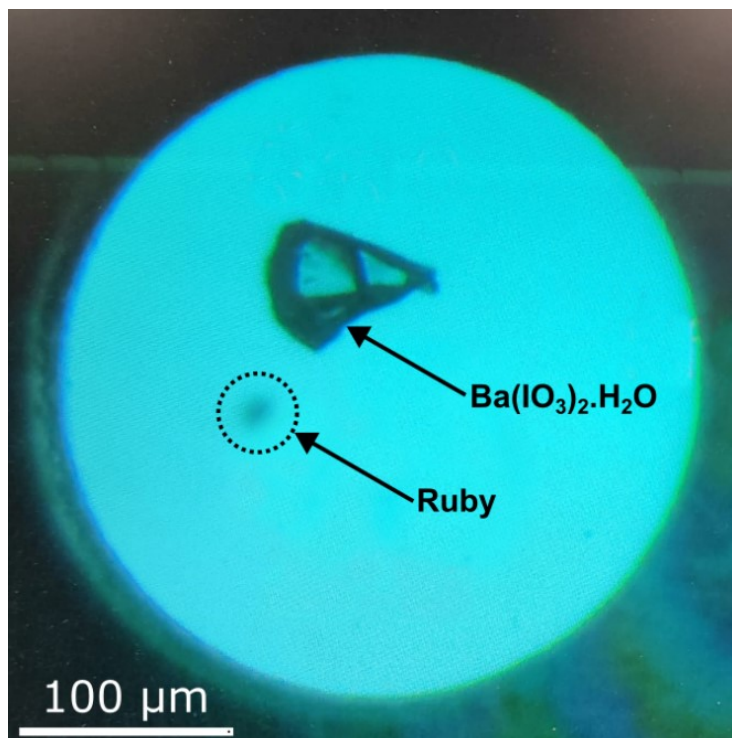

**Figure S1.** A single crystal of Ba(IO<sub>3</sub>)<sub>2</sub>·H<sub>2</sub>O loaded in the helium filled sample chamber of a membrane-driven diamond anvil cell. The chamber includes a ruby sphere for pressure measurement. The diameter of the sample chamber is 300 μm; the gasket thickness is 90 μm; the crystal size is approximately 50 μm, and the beamsize (at beamline ID15B at the ESRF, where this photograph was taken) is 1 × 1 μm, as indicated by the black dot on the right-hand side of the white scale bar.

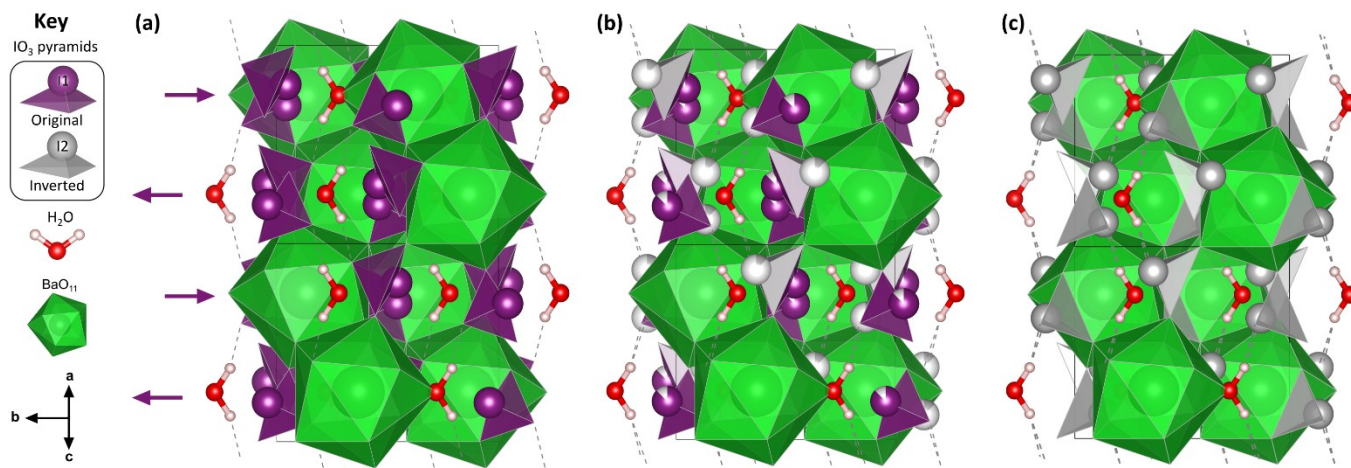

**Figure S2 | The crystal structure of  $\text{Ba}(\text{IO}_3)_2 \cdot \text{H}_2\text{O}$  showing all atoms, to compliment Fig. 1. (a) The structure at ambient pressure. (b) The structure at 9.6 GPa where the occupation of the I2 site is 12.5 %. (c) The hypothetical fully inverted structure. The crystal structure is viewed along the  $ac$  body diagonal, perpendicular to the  $b$  axis:  $uvw$  projection vector (101),  $hkl$  upwards vector (100). Hydrogen bonds are shown as dashed lines. The key shows the essential molecular units of the structure. The black arrows below the key indicate the crystal axes.**

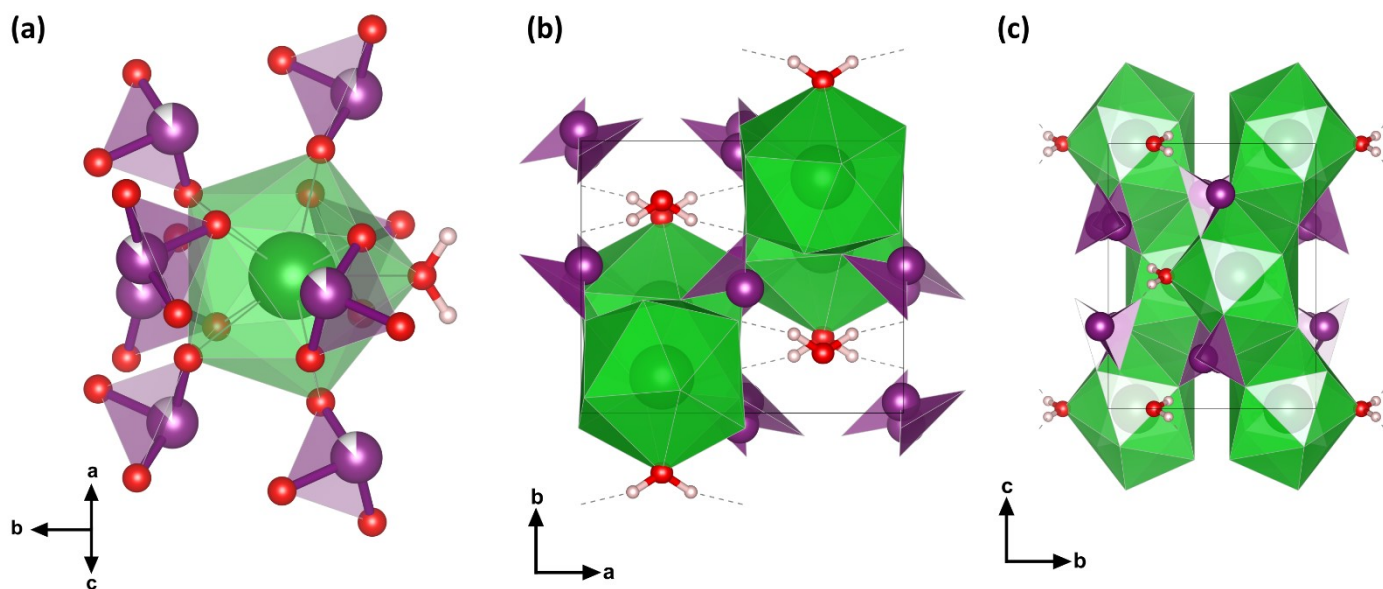

**Figure S3 | The BaO<sub>11</sub> unit and BaO<sub>11</sub> chains in the Ba(IO<sub>3</sub>)<sub>2</sub>·H<sub>2</sub>O crystal structure. (a)** The BaO<sub>11</sub> unit showing the coordinating IO<sub>3</sub><sup>-</sup> pyramids. The eleven Ba-O distances range between 2.686(8) Å and 3.173(4) Å at ambient pressure. **(b)** The projection along the *c* axis to show the chains of edge-sharing BaO<sub>11</sub> octadecahedra which run parallel to the *c*-axis. **(c)** The projection along the *a*-axis to show the chains running from top to bottom of the figure.

**Table S1** | The SCXDR refinement data for selected pressures.

| Pressure (GPa)               | 0.0 (air)                                      | 4.77(5)                                        | 11.59(5)                                       | 14.84(5)                                       |
|------------------------------|------------------------------------------------|------------------------------------------------|------------------------------------------------|------------------------------------------------|
| Formula                      | BaH <sub>2</sub> I <sub>2</sub> O <sub>7</sub> |
| $D_{calc.}/g\text{ cm}^{-3}$ | 4.687                                          | 5.252                                          | 5.773                                          | 5.773                                          |
| $\mu/\text{mm}^{-1}$         | 14.158                                         | 15.866                                         | 17.437                                         | 17.437                                         |
| Formula Weight               | 505.16                                         | 505.16                                         | 505.16                                         | 505.16                                         |
| Colour                       | colourless                                     | colourless                                     | colourless                                     | colourless                                     |
| Shape                        | plate                                          | plate                                          | plate                                          | plate                                          |
| Size/mm <sup>3</sup>         | 0.15×0.10×0.06                                 | 0.15×0.10×0.06                                 | 0.08×0.05×0.04                                 | 0.08×0.05×0.04                                 |
| $T/K$                        | 298(2)                                         | 298(2)                                         | 298(2)                                         | 298(2)                                         |
| Crystal System               | monoclinic                                     | monoclinic                                     | monoclinic                                     | monoclinic                                     |
| Space Group                  | $I2/a$                                         | $I2/a$                                         | $I2/a$                                         | $I2/a$                                         |
| $a/\text{Å}$                 | 9.0494(2)                                      | 8.9191(6)                                      | 8.7759(4)                                      | 8.7461(14)                                     |
| $b/\text{Å}$                 | 7.9814(2)                                      | 7.4877(6)                                      | 7.1478(11)                                     | 6.9730(13)                                     |
| $c/\text{Å}$                 | 9.9187(3)                                      | 9.578(8)                                       | 9.2808(11)                                     | 9.136(3)                                       |
| $\alpha/^\circ$              | 90                                             | 90                                             | 90                                             | 90                                             |
| $\beta/^\circ$               | 92.147(2)                                      | 92.91(3)                                       | 93.209(6)                                      | 93.19(2)                                       |
| $\gamma/^\circ$              | 90                                             | 90                                             | 90                                             | 90                                             |
| $V/\text{Å}^3$               | 715.89(3)                                      | 638.8(6)                                       | 581.26(12)                                     | 556.3(3)                                       |
| $Z$                          | 4                                              | 4                                              | 4                                              | 4                                              |
| $Z'$                         | 0.5                                            | 0.5                                            | 0.5                                            | 0.5                                            |
| Wavelength/Å                 | 0.71073                                        | 0.71073                                        | 0.71073                                        | 0.410                                          |
| Radiation type               | Mo $K_\alpha$                                  | Mo $K_\alpha$                                  | Mo $K_\alpha$                                  | Synchrotron                                    |
| $\theta_{min}/^\circ$        | 3.28                                           | 3.48                                           | 3.60                                           | 2.69                                           |
| $\theta_{max}/^\circ$        | 28.33                                          | 26.35                                          | 26.34                                          | 17.02                                          |
| Measured Refl.               | 1287                                           | 547                                            | 1287                                           | 513                                            |
| Independent Refl.            | 782                                            | 257                                            | 861                                            | 317                                            |
| Reflections with $I > 746$   |                                                | 257                                            | 346                                            | 317                                            |
| $2(I)$                       |                                                |                                                |                                                |                                                |
| $R_{int}$                    | 0.0190                                         | 0.0378                                         | 0.0184                                         | 0.0219                                         |
| Parameters                   | 52                                             | 33                                             | 34                                             | 35                                             |
| Restraints                   | 0                                              | 0                                              | 3                                              | 3                                              |
| Largest Peak                 | 0.931                                          | 0.94                                           | 2.13                                           | 2.23                                           |
| Deepest Hole                 | -1.234                                         | -1.10                                          | -1.52                                          | -1.97                                          |
| GooF                         | 1.099                                          | 1.227                                          | 1.080                                          | 1.082                                          |
| $wR_2$ (all data)            | 0.0499                                         | 0.1186                                         | 0.0753                                         | 0.1762                                         |
| $wR_2$                       | 0.0487                                         | 0.1167                                         | 0.0742                                         | 0.1721                                         |
| $R_1$ (all data)             | 0.0235                                         | 0.0407                                         | 0.0358                                         | 0.0798                                         |
| $R_1$                        | 0.0223                                         | 0.0378                                         | 0.0338                                         | 0.0755                                         |

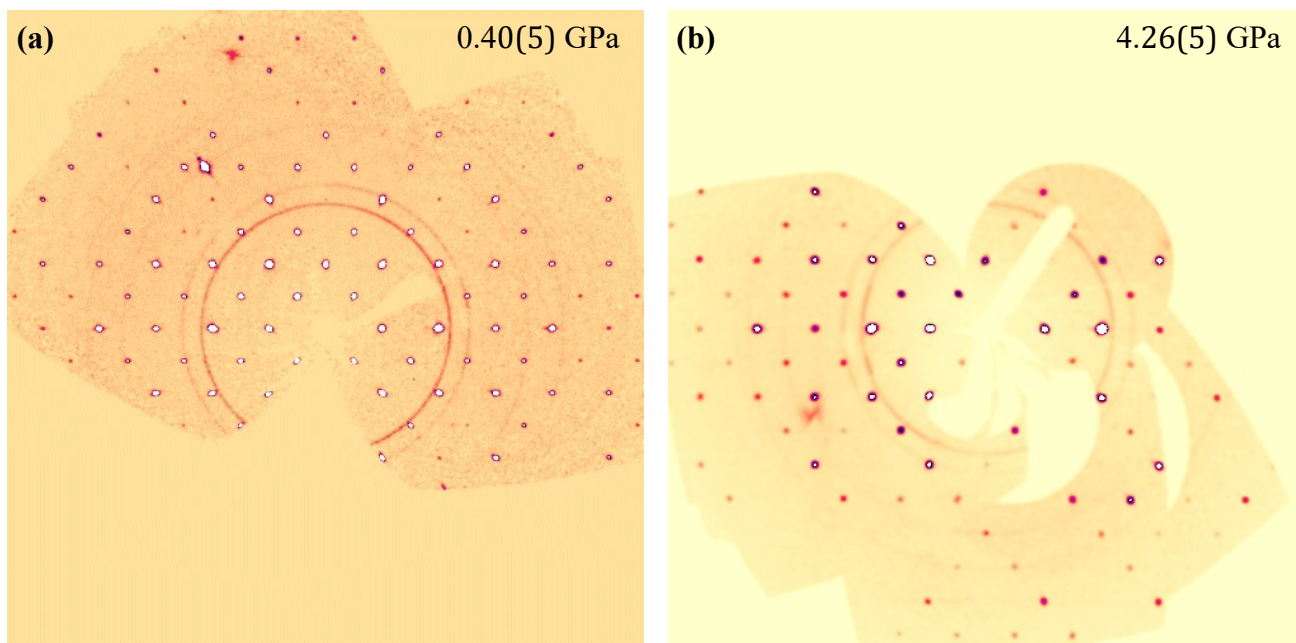

**Figure S4.** Single crystal X-ray diffraction patterns of  $\text{Ba}(\text{IO}_3)_2 \cdot \text{H}_2\text{O}$  at (a) 0.40(5) and (b) 4.26(5) GPa respectively.

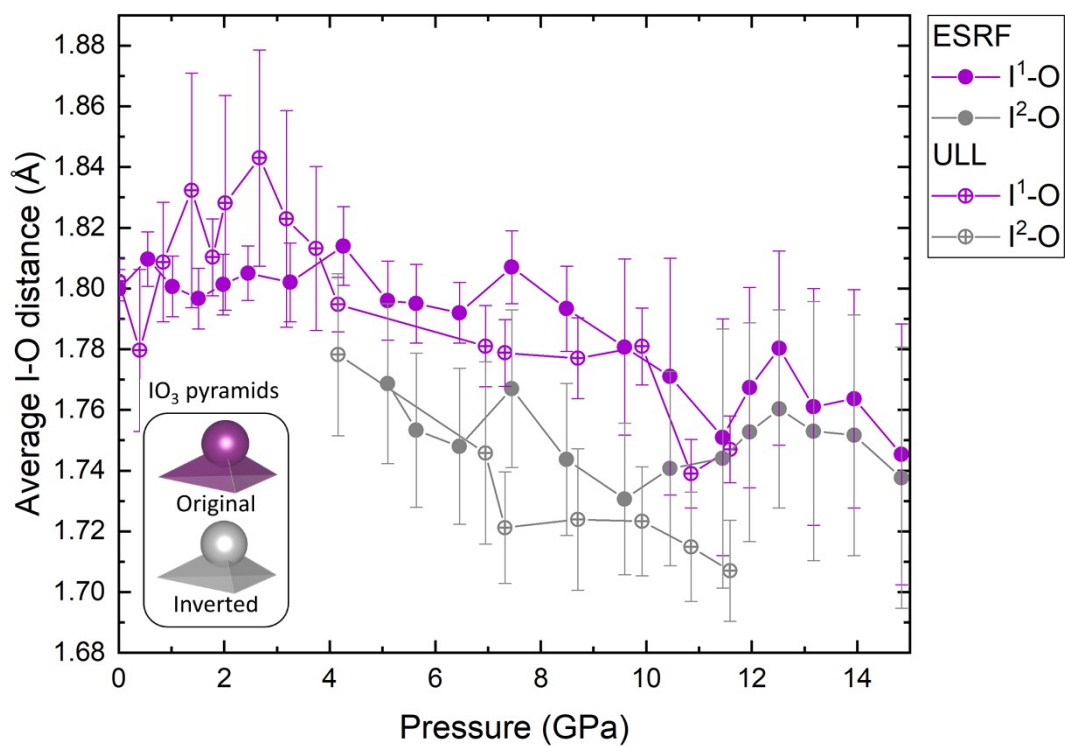

**Figure S5** | The average I-O bond distance as a function of pressure.

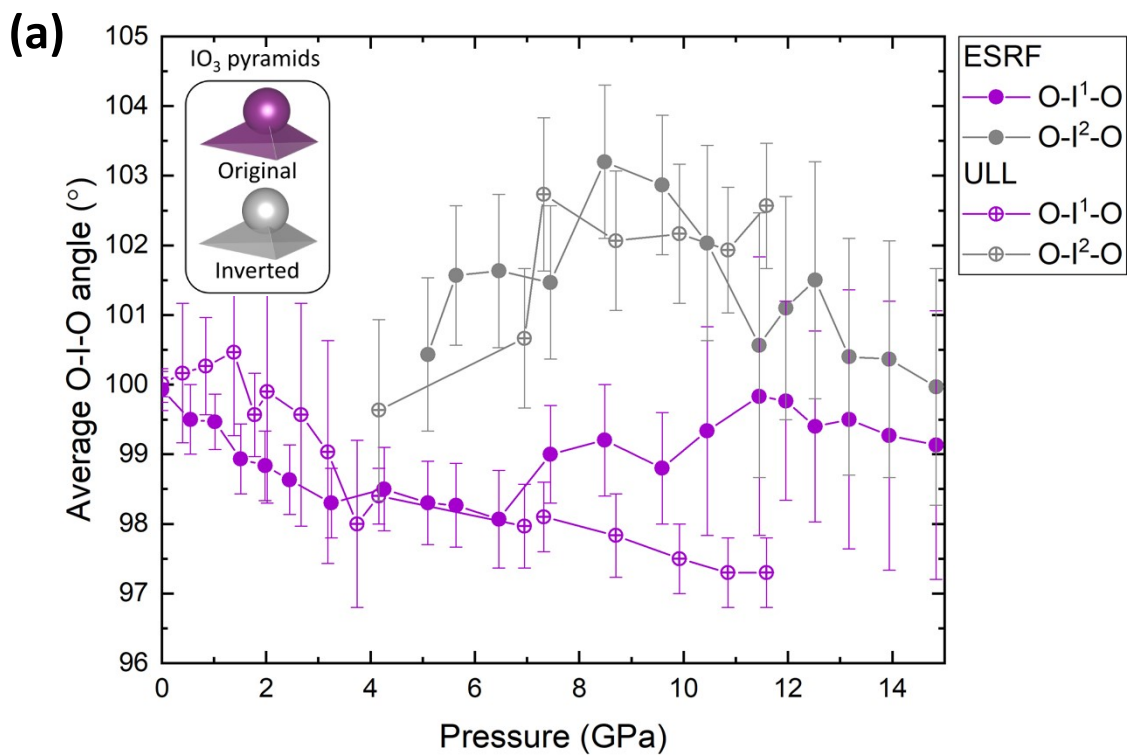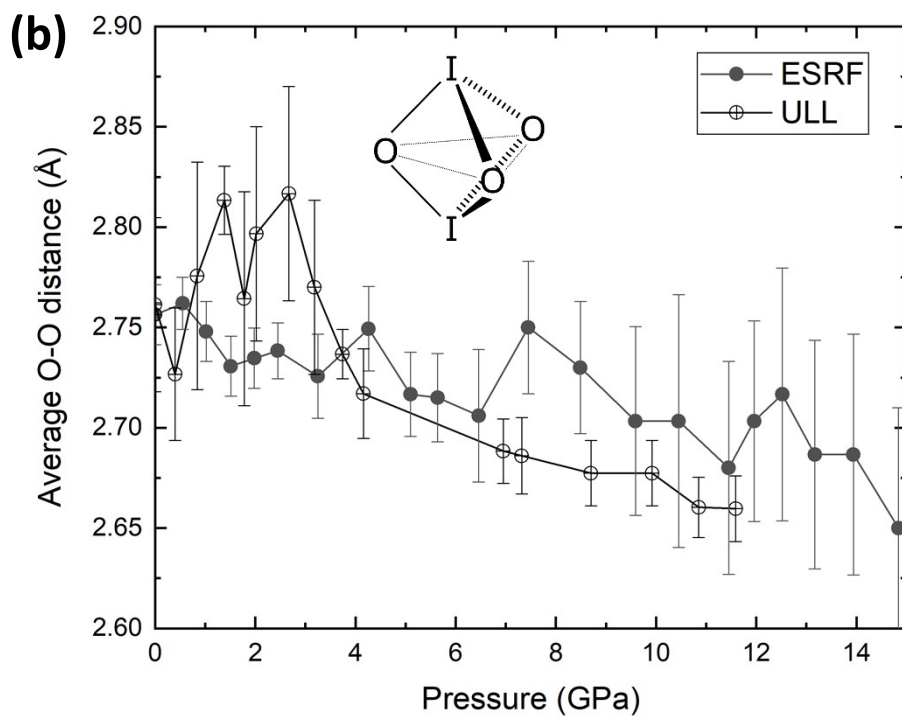

**Figure S6 | (a)** The average O-I-O angle as a function of pressure. **(b)** The average O-O distance (i.e., triangular base edge length) as a function of pressure.



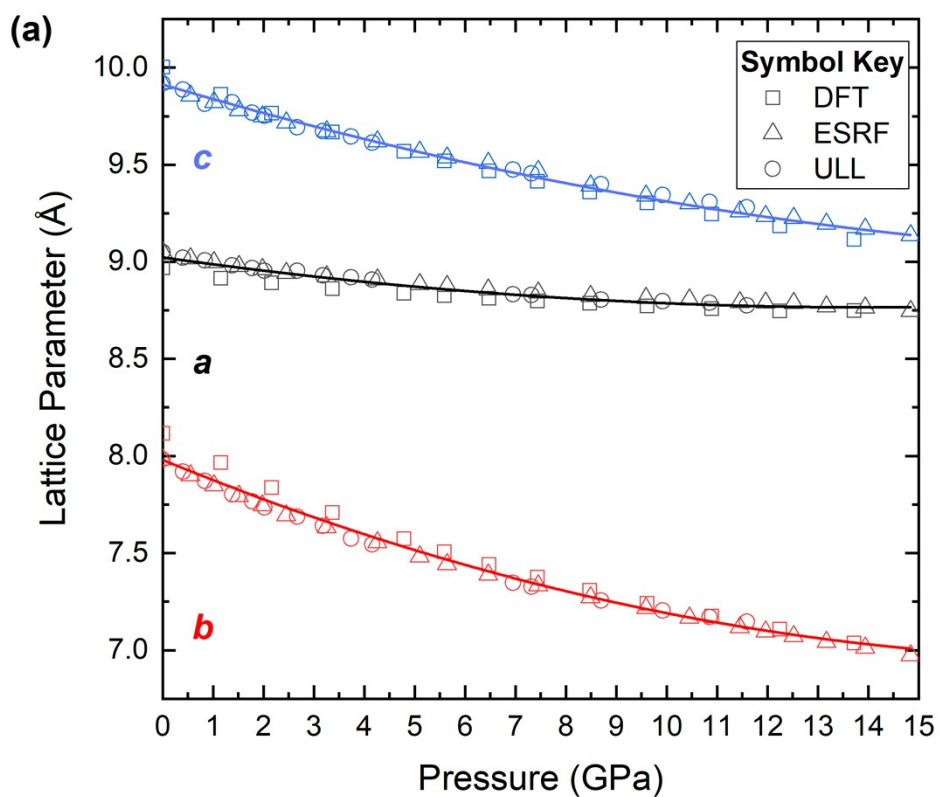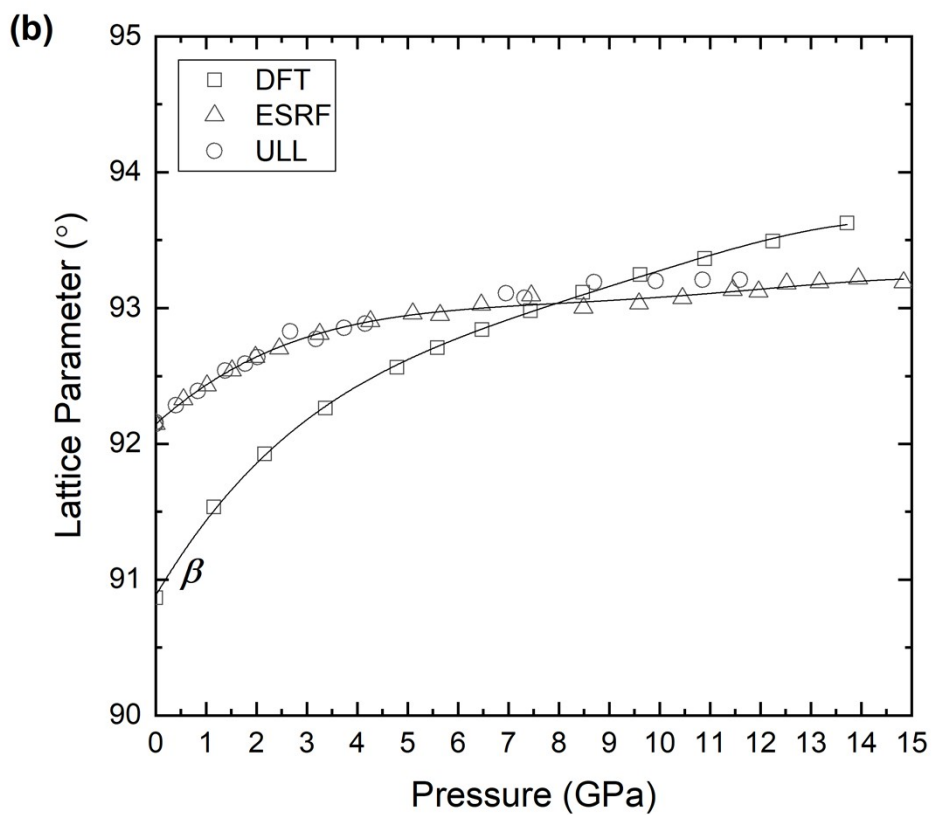

**Figure S7** | The pressure-evolution of the lattice parameters of the monoclinic ( $C2/c$ ) unit cell of  $Ba(IO_3)_2 \cdot H_2O$  according to DFT (squares) and SCXRD (triangles and circles).

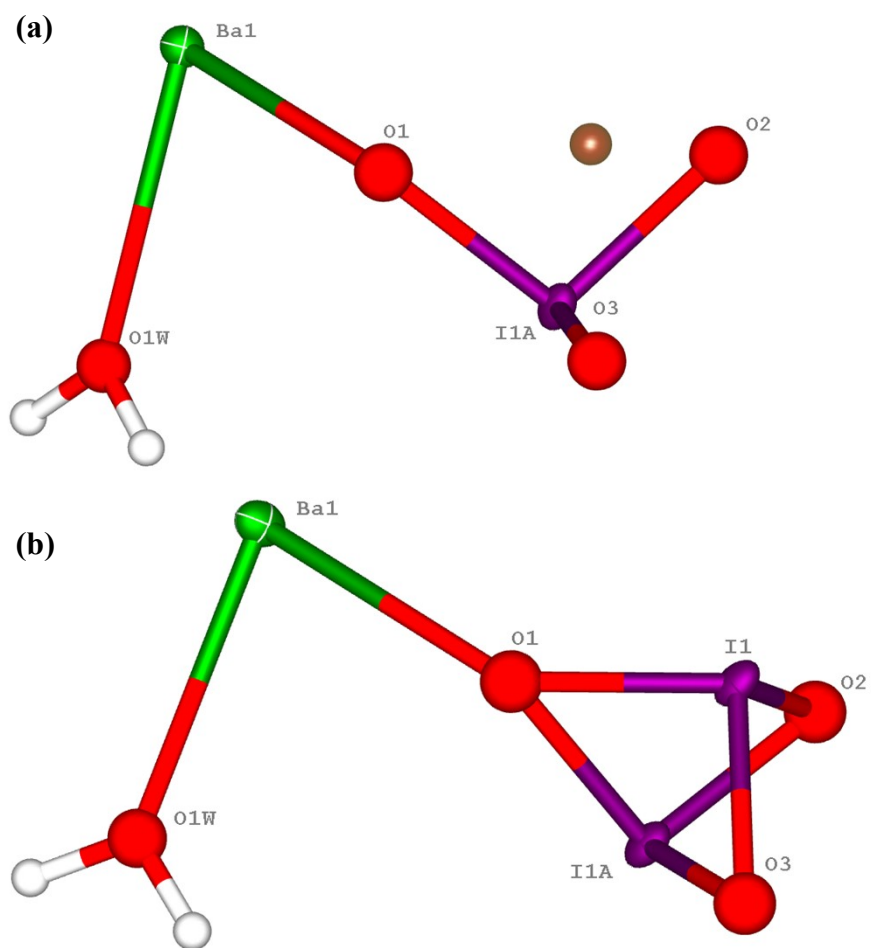

**Figure S8.** The  $\text{Ba}(\text{IO}_3)_2 \cdot \text{H}_2\text{O}$  structure at 4.26(5) GPa. **(a)** The residual charge density peak is shown in brown. **(b)** The I2 atom is placed at the location of the residual peak.

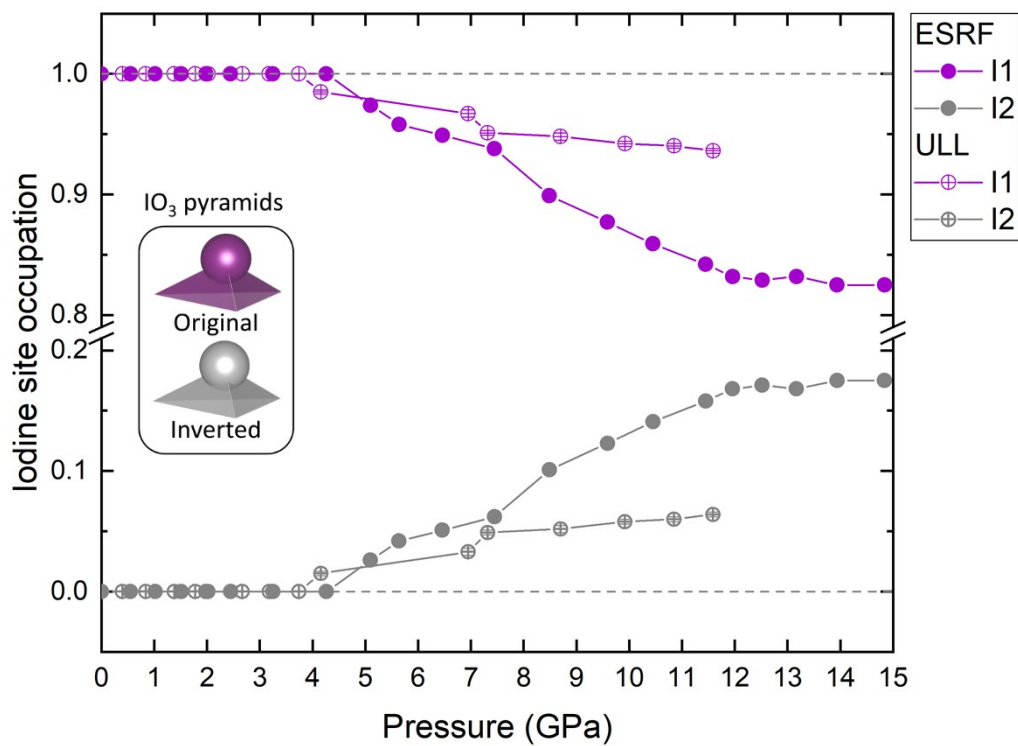

**Figure S9** | The iodine site occupation as a function of pressure. Error bars are included but the errors are smaller than the symbols.

## Text to create CIF file of the crystal structure of Ba(IO<sub>3</sub>)<sub>2</sub>·H<sub>2</sub>O at 0 GPa:

```
_chemical_name_common      'Ba H2 I2 O7'  
_cell_length_a             9.0494(2)  
_cell_length_b             7.9814(2)  
_cell_length_c             9.9187(4)  
_cell_angle_alpha         90.000000  
_cell_angle_beta          92.147(2)  
_cell_angle_gamma         90.000000  
_cell_volume               715.893896  
_space_group_name_H-M_alt  'I 2/a'  
_space_group_IT_number     15  
  
loop_  
_space_group_symop_operation_xyz  
'x, y, z'  
'-x, -y, -z'  
'-x+1/2, y, -z'  
'x+1/2, -y, z'  
'x+1/2, y+1/2, z+1/2'  
'-x+1/2, -y+1/2, -z+1/2'  
'-x, y+1/2, -z+1/2'  
'x, -y+1/2, z+1/2'  
  
loop_  
_atom_site_label  
_atom_site_occupancy  
_atom_site_fract_x  
_atom_site_fract_y  
_atom_site_fract_z  
_atom_site_adp_type  
_atom_site_U_iso_or_equiv  
_atom_site_type_symbol  
Ba1  1.0  0.250000  0.64115(5)  0.500000  Uani  0.014135  Ba  
I1   1.0  0.49076(3)  0.46621(4)  0.18817(3)  Uani  0.013133  I  
O1   1.0  0.4873(4)   0.5502(5)   0.3553(4)   Uani  0.022513  O  
O2   1.0  0.4921(4)   0.6568(5)   0.0896(4)   Uani  0.023840  O  
O3   1.0  0.6835(4)   0.4099(5)   0.1866(4)   Uani  0.020630  O  
O4   1.0  0.250000   0.3032(9)   0.500000   Uani  0.053100  O  
H    1.0  0.191(8)    0.250(9)    0.527(8)    Uiso  0.050000  H  
  
loop_  
_atom_site_aniso_label  
_atom_site_aniso_U_11  
_atom_site_aniso_U_22  
_atom_site_aniso_U_33  
_atom_site_aniso_U_12  
_atom_site_aniso_U_13  
_atom_site_aniso_U_23  
Ba1  0.01430  0.01430  0.01400  0.00000  0.00314  0.00000  
I1   0.01310  0.01480  0.01150  0.00126  0.00048  0.00060  
O1   0.02200  0.03400  0.01150  0.00420  0.00010 -0.00510  
O2   0.02100  0.02400  0.02700  0.00570  0.00730  0.01190  
O3   0.01500  0.02380  0.02300  0.00600 -0.00050 -0.00290  
O4   0.02500  0.01800  0.11700  0.00000  0.01200  0.00000
```

## Text to create CIF file of the crystal structure of Ba(IO<sub>3</sub>)<sub>2</sub>·H<sub>2</sub>O at 11.59 GPa:

```
_chemical_name_common      'Ba H2 I2 O7'  
_cell_length_a             8.7759(4)  
_cell_length_b             7.1478(11)  
_cell_length_c             9.2808(11)  
_cell_angle_alpha         90.000000  
_cell_angle_beta          93.209(6)  
_cell_angle_gamma         90.000000  
_cell_volume               581.256661  
_space_group_name_H-M_alt  'I 2/a'  
_space_group_IT_number     15  
  
loop_  
_space_group_symop_operation_xyz  
'x, y, z'  
'-x, -y, -z'  
'-x+1/2, y, -z'  
'x+1/2, -y, z'  
'x+1/2, y+1/2, z+1/2'  
'-x+1/2, -y+1/2, -z+1/2'  
'-x, y+1/2, -z+1/2'  
'x, -y+1/2, z+1/2'  
  
loop_  
_atom_site_label  
_atom_site_occupancy  
_atom_site_fract_x  
_atom_site_fract_y  
_atom_site_fract_z  
_atom_site_adp_type  
_atom_site_U_iso_or_equiv  
_atom_site_type_symbol  
Ba1  1.0  0.250000  1.12494(18)  0.000000  Uani  0.010956  Ba  
I1   0.9360  0.50726(9)  1.04634(16)  0.31095(10)  Uani  0.016303  I  
I2   0.0640  0.4080(13)  0.857(2)   0.2870(13)  Uani  0.016303  I  
O1   1.0   0.3028(10)  1.0780(15)  0.3114(11)  Uiso  0.019000  O  
O2   1.0   0.5046(10)  0.9372(15)  0.1408(11)  Uiso  0.020000  O  
O3   1.0   0.5192(11)  0.8476(17)  0.4205(13)  Uiso  0.029000  O  
O4   1.0   0.250000  0.758(3)   0.000000  Uiso  0.056000  O  
H1   0.5000  0.244590  0.684685   0.073469  Uiso  0.083000  H  
H2   0.5000  0.255410  0.684685  -0.073469  Uiso  0.083000  H  
  
loop_  
_atom_site_aniso_label  
_atom_site_aniso_U_11  
_atom_site_aniso_U_22  
_atom_site_aniso_U_33  
_atom_site_aniso_U_12  
_atom_site_aniso_U_13  
_atom_site_aniso_U_23  
Ba1  0.00860  0.01150  0.01270  0.00000  0.00000  0.00000  
I1   0.01390  0.02490  0.01000  0.00910 -0.00030 -0.00090  
I2   0.01390  0.02490  0.01000  0.00910 -0.00030 -0.00090
```

## Text to create CIF file of the crystal structure of Ba(IO<sub>3</sub>)<sub>2</sub>·H<sub>2</sub>O at 14.84 GPa:

```
_chemical_name_common      'Ba H2 I2 O7'  
_cell_length_a             8.7461(14)  
_cell_length_b             6.9730(13)  
_cell_length_c             9.136(3)  
_cell_angle_alpha         90.000000  
_cell_angle_beta          93.19(2)  
_cell_angle_gamma         90.000000  
_cell_volume               556.309835  
_space_group_name_H-M_alt  'I 2/a'  
_space_group_IT_number     15
```

loop\_

```
_space_group_symop_operation_xyz
```

```
'x, y, z'  
'-x, -y, -z'  
'-x+1/2, y, -z'  
'x+1/2, -y, z'  
'x+1/2, y+1/2, z+1/2'  
'-x+1/2, -y+1/2, -z+1/2'  
'-x, y+1/2, -z+1/2'  
'x, -y+1/2, z+1/2'
```

loop\_

```
_atom_site_label  
_atom_site_occupancy  
_atom_site_fract_x  
_atom_site_fract_y  
_atom_site_fract_z  
_atom_site_adp_type  
_atom_site_U_iso_or_equiv  
_atom_site_type_symbol  
Ba1  1.0  0.750000  0.6239(4)  0.500000  Uani  0.022354  Ba  
I1   0.8250 0.5085(2)  0.4509(4)  0.8114(4)  Uani  0.030829  I  
I2   0.1750 0.4098(11) 0.6488(15) 0.7929(18) Uani  0.030829  I  
O1   1.0  0.503(2)  0.568(2)  0.651(4)  Uiso  0.034000  O  
O2   1.0  0.528(4)  0.629(4)  0.943(9)  Uiso  0.102000  O  
O3   1.0  0.301(2)  0.421(2)  0.810(4)  Uiso  0.036000  O  
O4   1.0  0.750000  0.250(5)  0.500000  Uiso  0.049000  O  
H1   0.5000 0.838612  0.157349  0.469363  Uiso  0.074000  H  
H2   0.5000 0.661388  0.157349  0.530637  Uiso  0.074000  H
```

loop\_

```
_atom_site_aniso_label  
_atom_site_aniso_U_11  
_atom_site_aniso_U_22  
_atom_site_aniso_U_33  
_atom_site_aniso_U_12  
_atom_site_aniso_U_13  
_atom_site_aniso_U_23  
Ba1  0.01650 0.03250 0.01800 0.00000 0.00040 0.00000  
I1   0.02610 0.05320 0.01300 -0.01490 -0.00060 0.00090  
I2   0.02610 0.05320 0.01300 -0.01490 -0.00060 0.00090
```
